# Supplementary material for: hu.MAP3.0: Atlas of human protein complexes by integration of > 25,000 proteomic experiments
Source: PubMed Central journal article supplement (PMC11507723; doi:10.1101/2024.10.11.617930), 2024-10-15

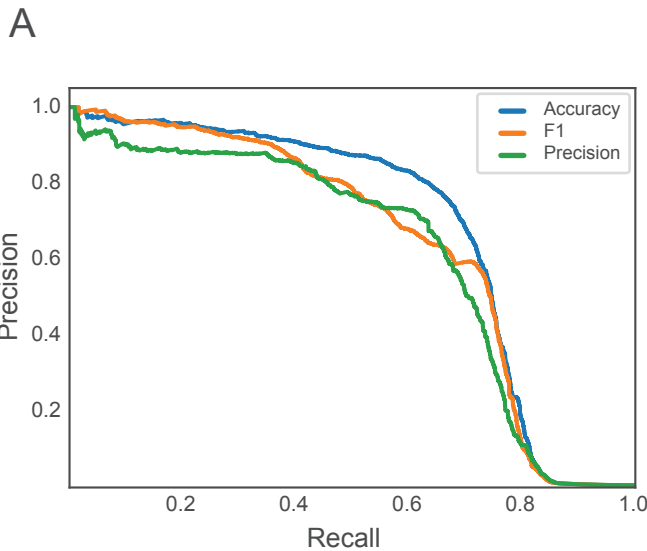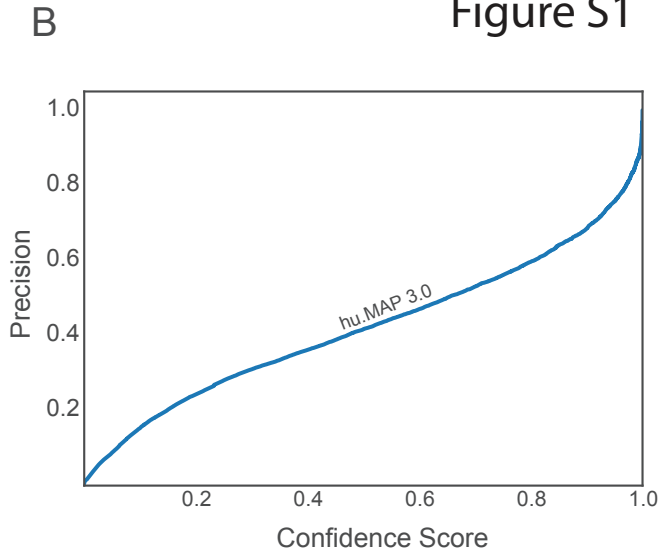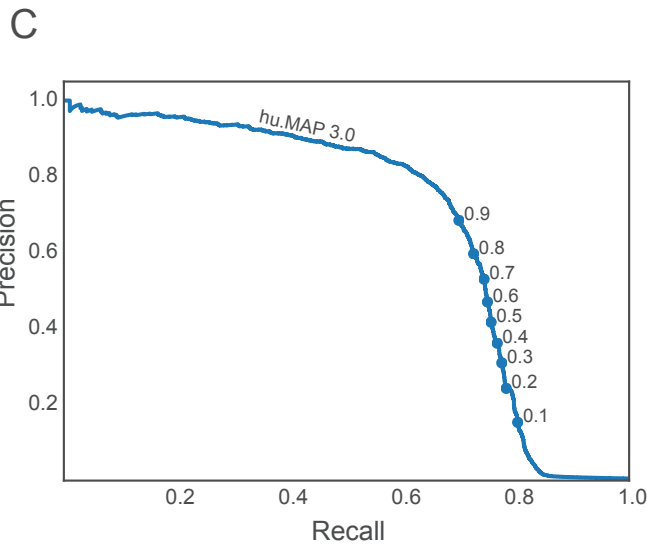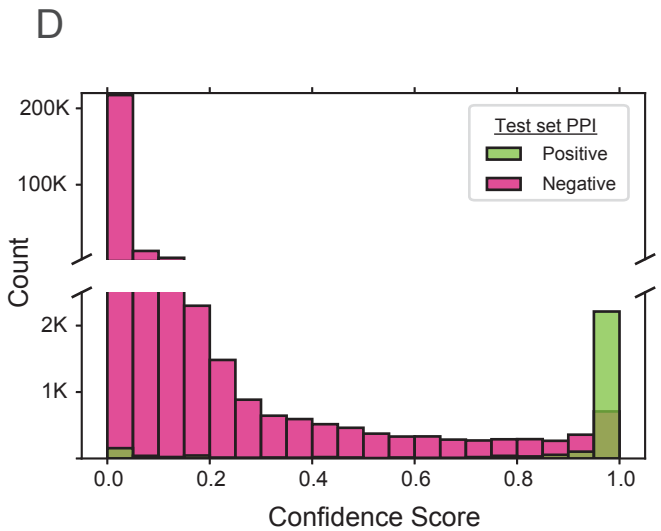

Figure S2

A

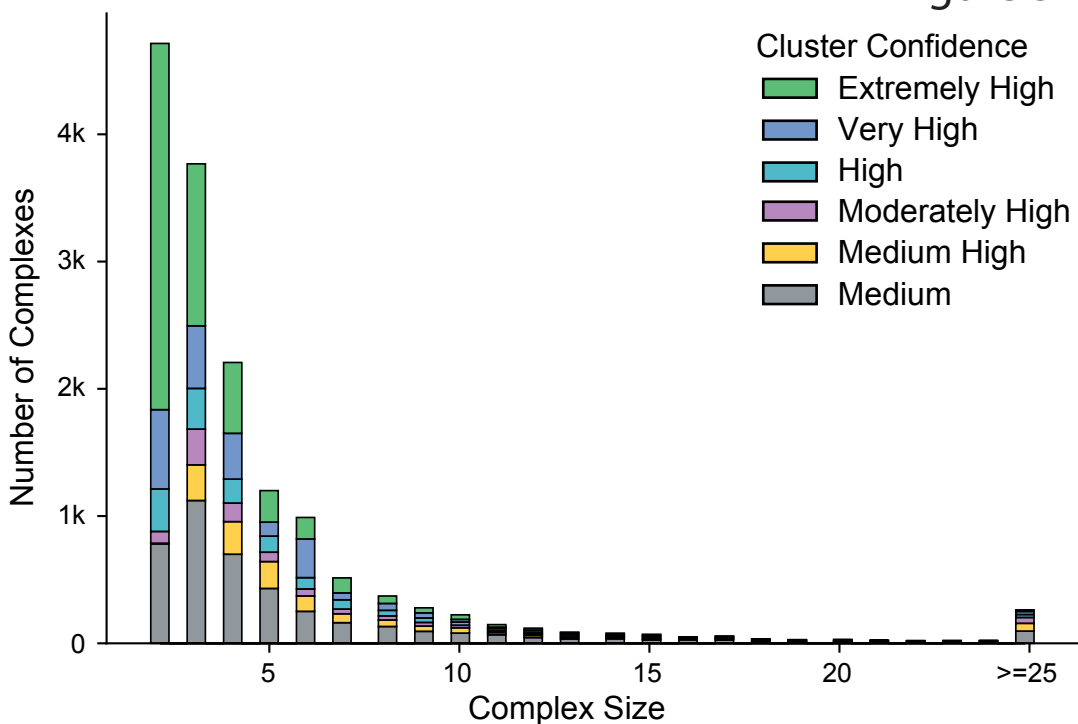

B

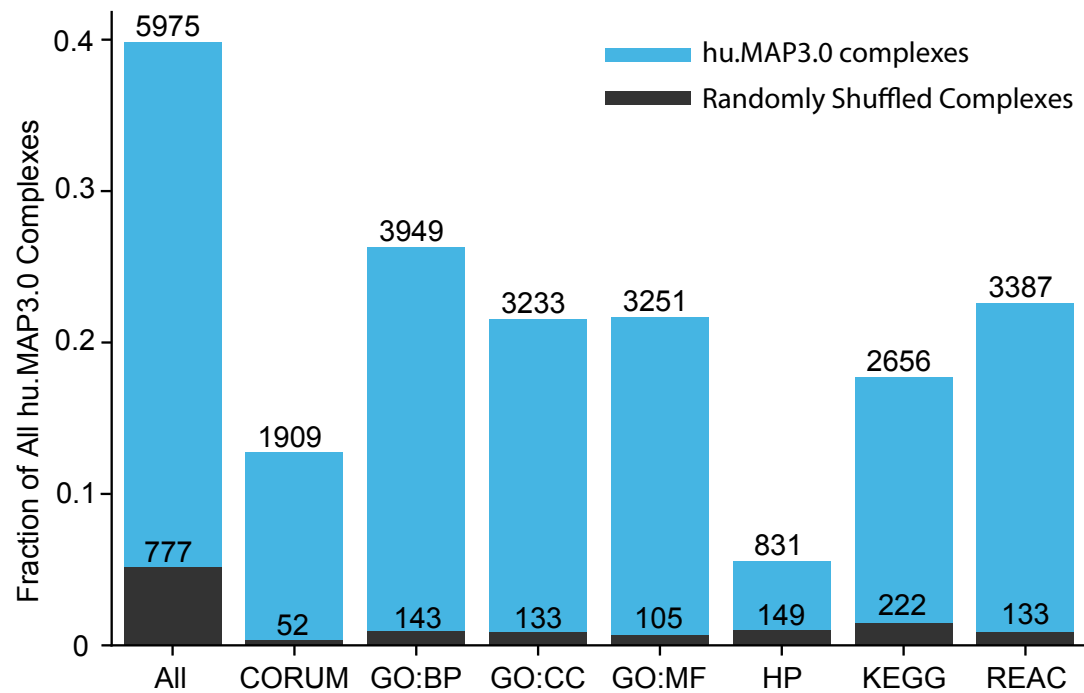

bioRxiv preprint doi: <https://doi.org/10.1101/2024.10.11.617930>; this version posted October 15, 2024. The copyright holder for this preprint (which was not certified by peer review) is the author/funder, who has granted bioRxiv a license to display the preprint in perpetuity. It is made available under a [CC-BY 4.0 International license](#).

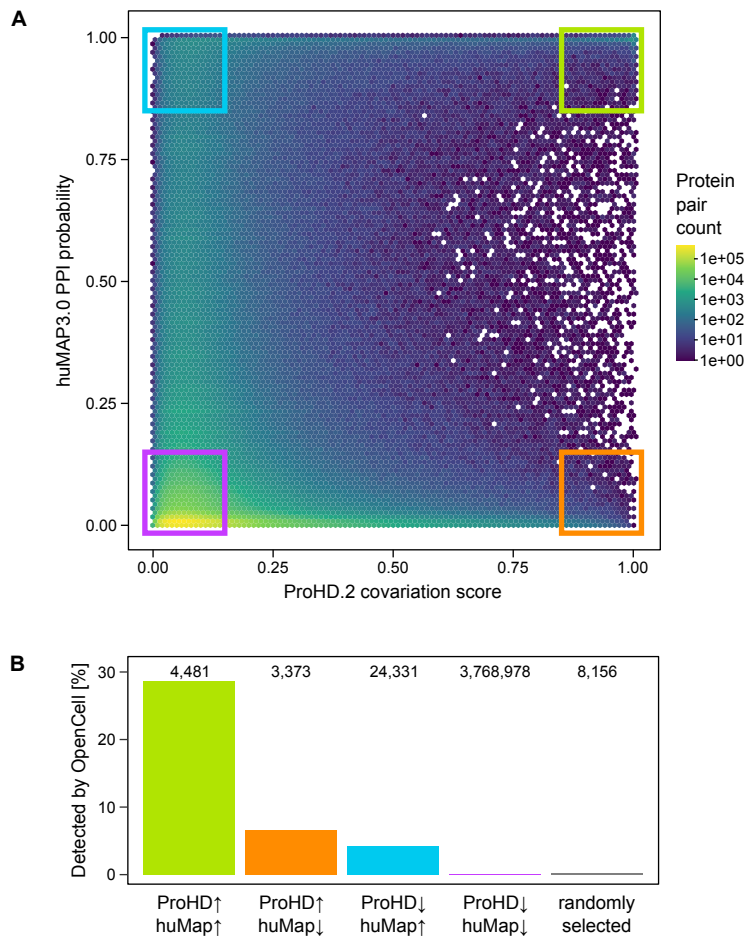

bioRxiv preprint doi: <https://doi.org/10.1101/2024.10.11.617930>; this version posted October 15, 2024. The copyright holder for this preprint (which was not certified by peer review) is the author/funder, who has granted bioRxiv a license to display the preprint in perpetuity. It is made available under a [CC-BY 4.0 International license](#).

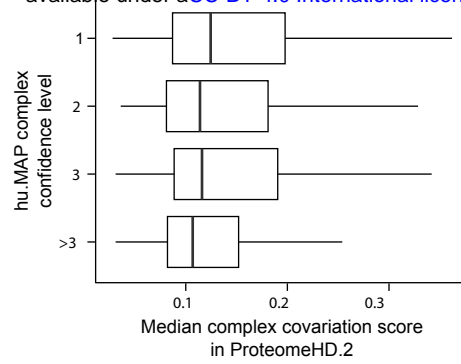

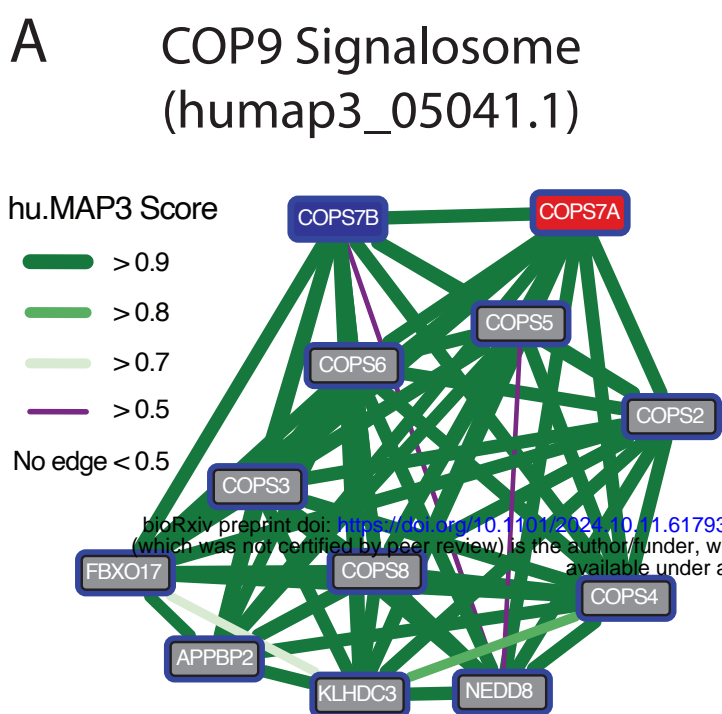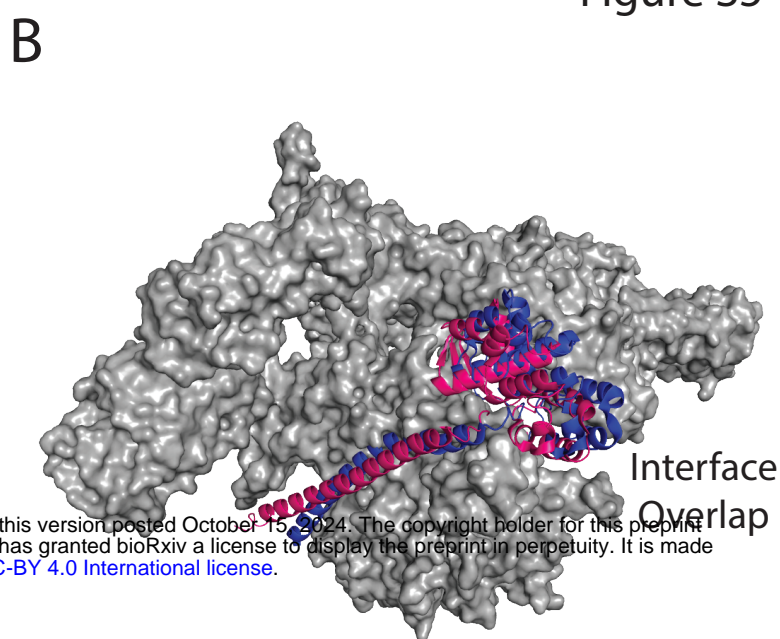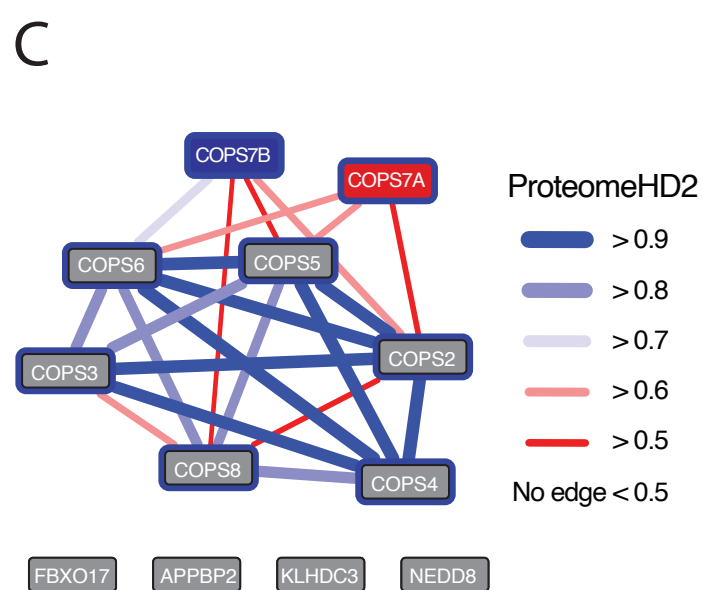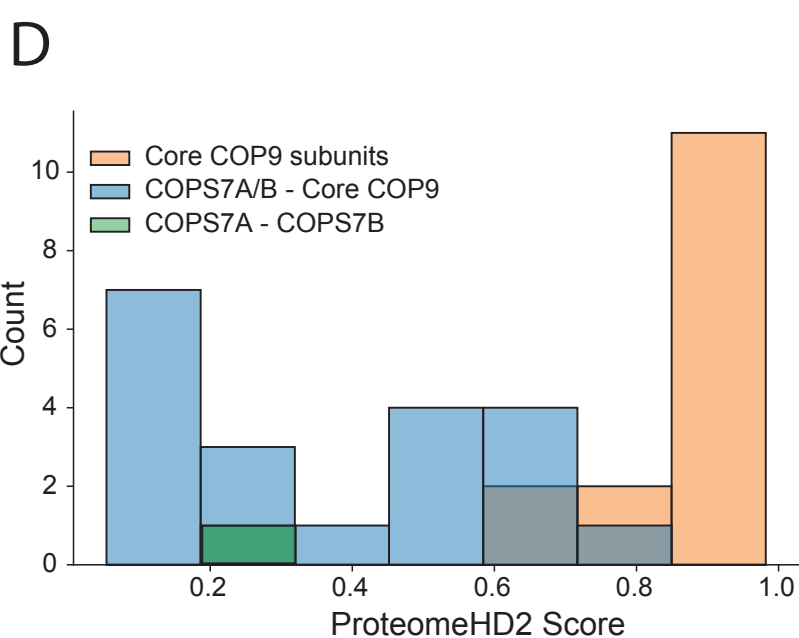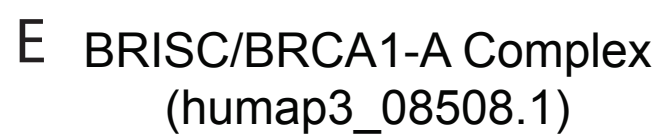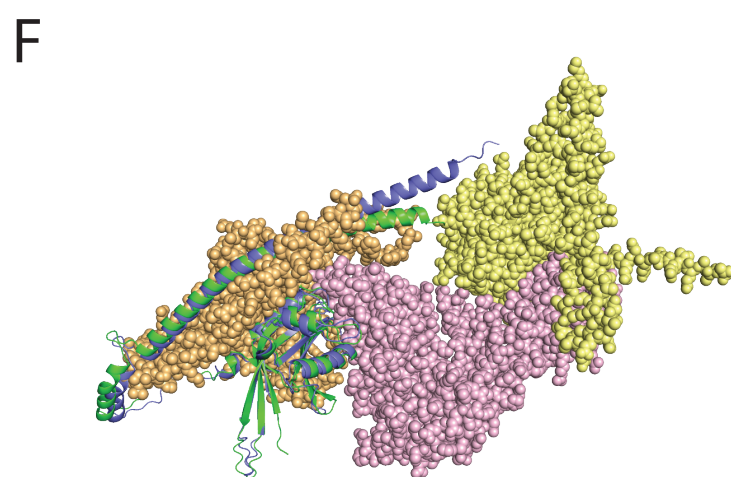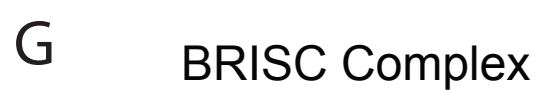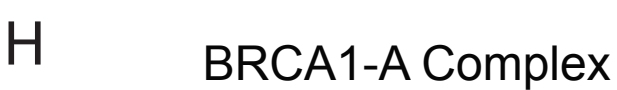

A

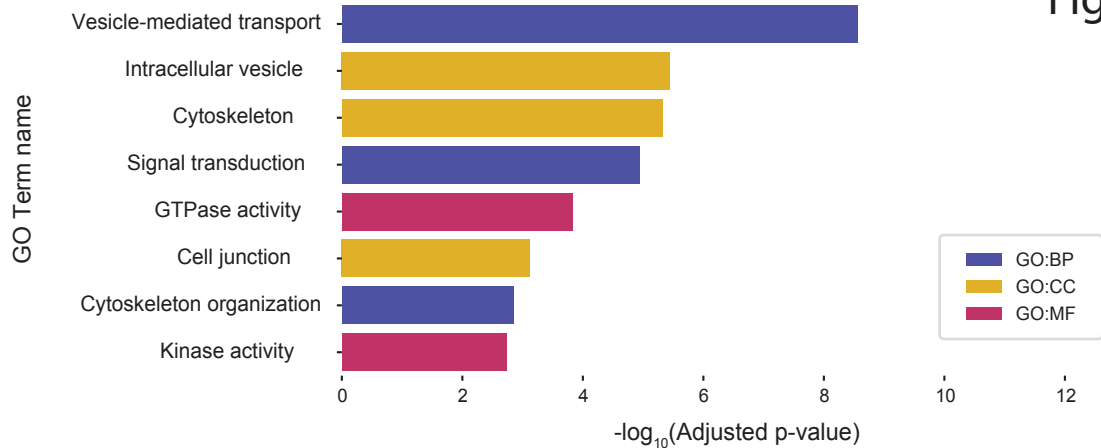

B

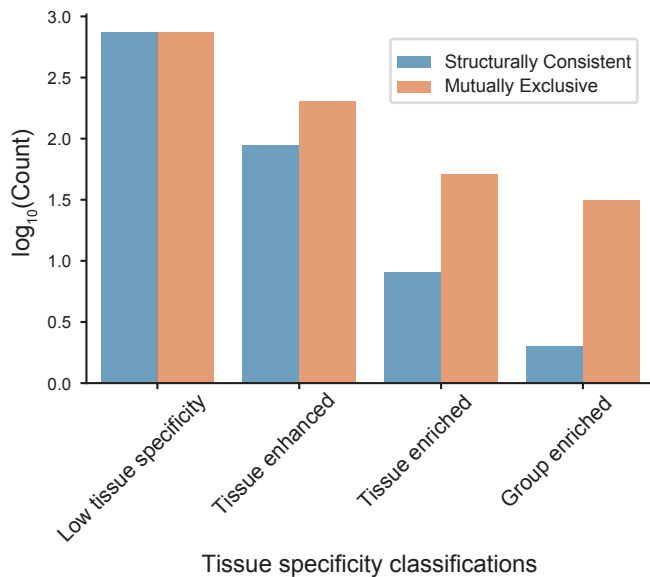

C

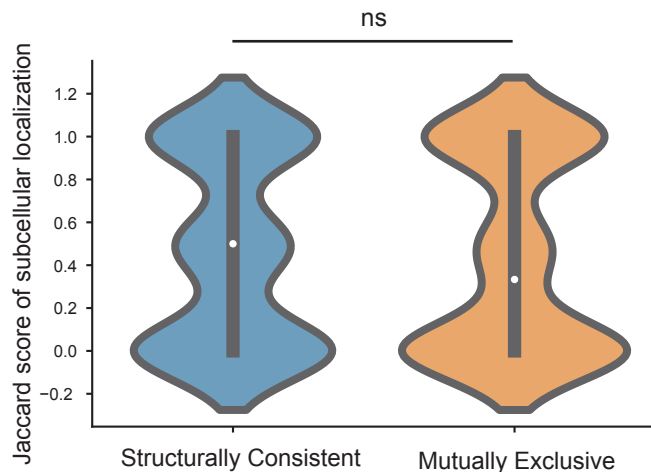

bioRxiv preprint doi: <https://doi.org/10.1101/2024.10.11.617930>; this version posted October 15, 2024. The copyright holder for this preprint (which was not certified by peer review) is the author/funder, who has granted bioRxiv a license to display the preprint in perpetuity. It is made available under a [CC-BY 4.0 International license](#).

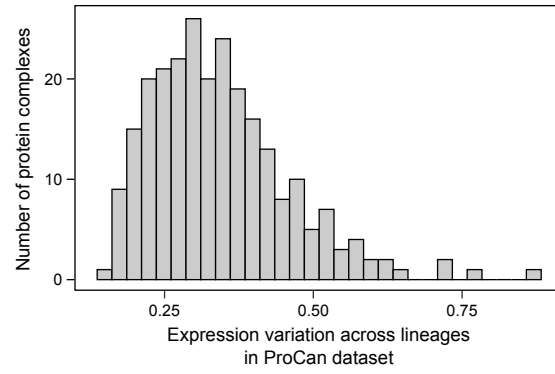

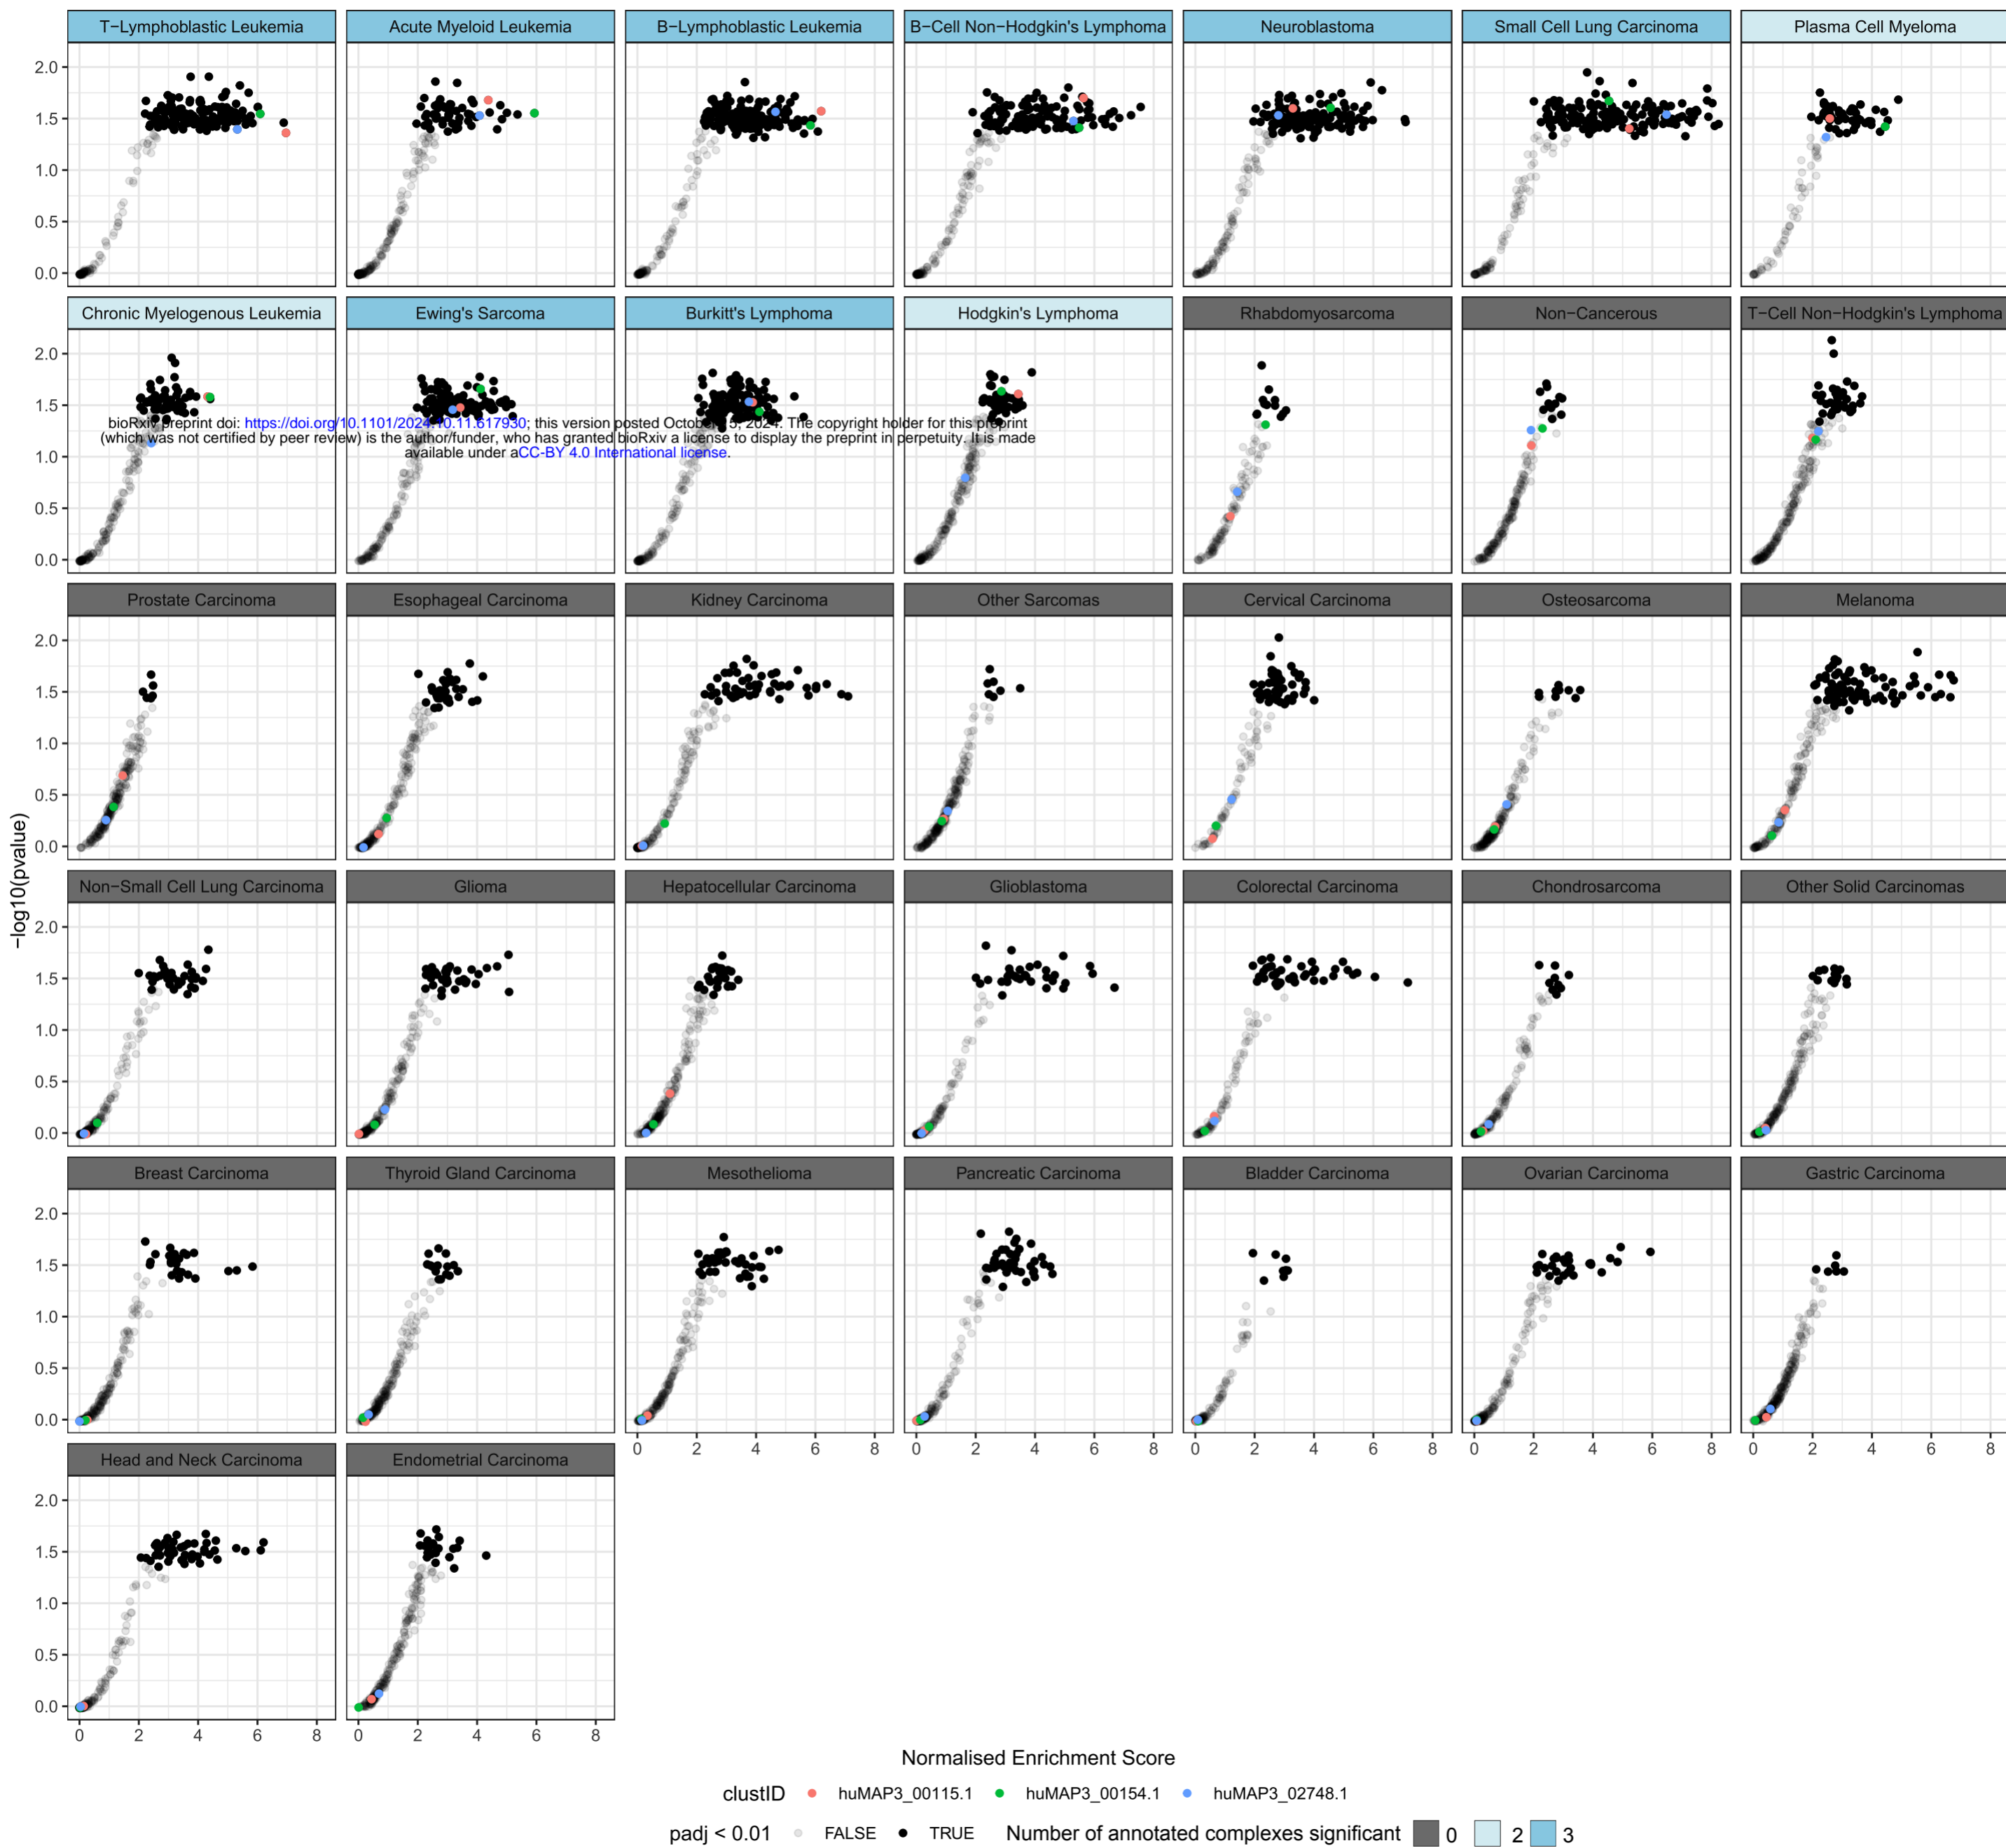

Supplement: NIHPP2024.10.11.617930V1-supplement-1.pdf [file NIHPP2024.10.11.617930V1-supplement-1.pdf]
